# Supplementary material for: Long-Read Sequencing Reveals Evolution and Acquisition of Antimicrobial Resistance and Virulence Genes in Salmonella enterica
Source: Front Microbiol. 2021 Nov 19;12:777817. doi: 10.3389/fmicb.2021.777817 (PMC8640207; doi:10.3389/fmicb.2021.777817)
Supplement: Supplementary file 1 [file Table_1.xlsx]

## Sheet: Table S1
Supplemantary Table 1: Distribution of AMR and HMR Genes associated with Genomic location
ID	FSIS ID	Serovar	Source	State	Year	location	qlen	circular	SPIs	PlasmidFinder	Plasmid type	spv	Core_AMR	Core_Biocide	Plus_AMR	Plus_Metal	Plus_Virulence	Accession number
F18S001	FSIS1605743	Muenster	Cecal turkey	CA	2016	chromosome	4816928	Y	3 10 13 1 9 24 23 18 2 11 5 14 6 4						mdsA mdsB	silE silS silR silC silF silB silA silP pcoA pcoB pcoC pcoD pcoR pcoS pcoE golS golT fieF		CP082486-CP082487
						pF18S001	211869	Y		IncQ1 IncFIA(HI1) IncHI1A IncHI1B(R27)	Combination		catA1 dfrA12 aadA2 sul1 blaTEM-1 aac(3)-IId sul2 aph(3'')-Ib aph(6)-Id tet(B)	qacEdelta1		merC merP merT merR
F18S002	FSIS1605910	I 4,[5],12:i:-	Cecal turkey	MN	2016	chromosome	4918054	Y	3 13 1 9 24 12 2 11 5 14 16 6 4	IncQ1			tet(B) sul2 aph(3'')-Ib aph(6)-Id blaTEM-1		mdsA mdsB	merR merT merP merC golS golT fieF		CP082518-CP082520
						pF18S002-1	113147	Y		IncI1-I(Gamma)	IncI		sul1 aac(3)-VIa aadA1 blaHER-3	qacEdelta1
						pF18S002-2	88577	Y		IncC	IncC		floR tet(A) aph(6)-Id aph(3'')-Ib sul2			merE merD merB merA merP merT merR
F18S003	FSIS1606026	Agona	Cecal swine	NJ	2016	chromosome-p1	2192596	N	16 6 11 2 12 19 5 16				fosA7.2		mdsA mdsB	golS golT		AAKNJT000000000
						chromosome-p2	2730906	N	24 9 1 8 3 4							fieF
						pF18S003-1	159370	Y		IncC	IncC		sul1 dfrA1 floR tet(A) aph(6)-Id aph(3'')-Ib sul2 blaCMY-2	qacEdelta1		merR merT merP merA merB
						pF18S003-2	3830	Y		Col(pHAD28)	Col
						pF18S003-3	3071	Y		Col(pHAD28)	Col		qnrB19
F18S004	FSIS1606077	Typhimurium	Cecal chicken	WV	2016	chromosome	4784280	N	2 12 24 9 6 4 3 13 1 16 14 5 11 2						mdsB mdsA	terW terZ terD fieF golT golS		CP082515-CP082517
						pF18S004-1	185614	N			Unknown		tet(C) aadA1 aac(3)-VIa sul1 tet(A) sul2	qacEdelta1		merE merD merA merT merR silE silS silR silC silF silB silA silP merR
						pF18S004-2	4673	Y		Col(pHAD28)	Col
F18S005	FSIS1606132	Ohio	Cecal swine	UT	2016	chromosome	4733265	N	2 11 5 16 6 4 3 8 1 9 24 12						mdsB mdsA	golS golT fieF	sinH	CP082511-CP082514
						pF18S005-1	176970	Y		IncC	IncC		floR tet(A) aph(6)-Id aph(3'')-Ib sul2 blaCMY-2 blaTEM aph(3')-Ia sul1 aac(3)-VIa aadA6	qacEdelta1		merR merT merP merA merB merD merE
						pF18S005-2	4418	Y		Col(pHAD28)	Col
						pF18S005-3	3830	Y		Col(pHAD28)	Col
F18S006	FSIS1606504	Muenchen	Cecal cattle	TN	2016	chromosome	4836400	Y	3 13 1 9 24 16 14 5 11 2 12 6 4						mdsA mdsB	golS golT fieF		CP082506-CP082510
						pF18S006-1	108501	Y		IncI1-I(Gamma)	IncI		blaCMY-2
						pF18S006-2	10910	Y		IncQ1	IncQ		tet(A) aph(6)-Id aph(3'')-Ib sul2
F18S007	FSIS1606640	Heidelberg	Cecal turkey	MN	2016	chromosome	4985524	Y	4 6 16 14 5 11 2 12 24 9 1 13 3				fosA7		mdsA mdsB	arsR golS golT fieF		CP082502-CP082505
						pF18S007-1	98997	Y		IncI1-I(Gamma)	IncI		blaCMY-2
						pF18S007-2	4460	Y		Col(pHAD28)	Col
						pF18S007-3	2257	Y		ColpVC	Col
F18S008	FSIS1607113	Agona	Cecal swine	IN	2016	chromosome	4929810	Y	3 8 1 9 24 23 11 2 12 19 5 16 6 4				fosA7.2		mdsA mdsB	golS golT fieF		CP082482-CP082485
						pF18S008-1	163271	Y		IncC	IncC		blaTEM-1 aph(4)-Ia aac(3)-IVa bleO aadA2 dfrA12 sul2 aph(3'')-Ib aph(6)-Id tet(A)	qacL		silE silS silR silC silF silB silA silP
						pF18S008-2	64161	N		IncI2	IncI
						pF18S008-3	3609	Y			Unknown
F18S009	FSIS1607290	Newport	Cecal cattle	KS	2016	chromosome	4871447	Y	4 6 16 14 5 11 2 12 24 9 10 1 13 3						mdsA mdsB	golS golT fieF		CP082478-CP082481
						pF18S009-1	123315	N		IncC	IncC		blaCMY sul2 aph(3'')-Ib aph(6)-Id tet(A) floR blaCMY-2			merR merT merP merA merB merD merE
						pF18S009-2	3605	Y		Col(pHAD28)	Col
						pF18S009-3	3070	Y		Col(pHAD28)	Col		qnrB19
F18S010	FSIS1607294	I 4,[5],12:i:-	Cecal turkey	SD	2016	chromosome	5001350	Y	3 13 1 9 24 12 2 11 5 14 16 6 4	IncQ1			tet(B) sul2 aph(3'')-Ib aph(6)-Id blaTEM-1		mdsA mdsB	merR merT merP merC golS golT pcoS pcoR pcoD pcoC pcoA silP silA silB silF silC silR silS silE arsC arsB arsA arsD arsR fieF		CP082475-CP082477
						pF18S010	181174	Y		IncC	IncC		blaTEM-1 aph(3')-Ia sul1 aac(3)-VIa aadA1 blaCMY-2 sul2 aph(3'')-Ib aph(6)-Id tet(A) floR	qacEdelta1		merR merT merP merA merB merD merE
						F18S010-qnr	3071	Y		Col(pHAD28)	Col		qnrB19
F18S011	FSIS1607386	Montevideo	Cecal cattle	SC	2016	chromosome	4673933	Y	16 14 5 11 2 18 24 9 1 13 3 4 6				fosA7			golS golT fieF		CP082500-CP082501
						pF18S011	96472	Y		IncC	IncC		floR floR tet(A) aph(6)-Id aph(3'')-Ib sul2 blaCMY-2
F18S012	FSIS1607447	Typhimurium	Cecal chicken	PA	2016	chromosome	4962096	Y	3 13 1 9 24 12 2 11 5 14 16 6 4				sul1 blaCARB-2 tet(G) floR sul1 aadA2	qacEdelta1	mdsA mdsB	golS golT fieF		CP082473-CP082474
						pF18S012	93814	Y		IncFII(S)	IncF	spvRABCD
F18S013	FSIS1607455	Typhimurium	Cecal turkey	VA	2016	chromosome	4982000	Y	3 13 1 9 24 12 2 11 5 14 16 6 4				blaCMY-2		mdsA mdsB	golS golT fieF		CP082468-CP082472
						pF18S013-1	388732	Y		IncHI2A IncHI2 IncC	Combination		aph(6)-Id aph(3'')-Ib aac(3)-IVa aph(4)-Ia sul2 tet(A) tet(B)			terW terZ terD silE silS silR silC silF silB silA silP pcoA pcoB pcoC pcoD pcoR pcoS merR	ybtQ ybtP
						pF18S013-2	5463	Y		Col156	Col
						pF18S013-3	4681	Y		Col(pHAD28)	Col
						pF18S013-4	3133	Y		Col(pHAD28)	Col
F18S014	FSIS1607481	I 4,[5],12:i:-	Cecal cattle	WI	2016	chromosome	5029960	Y	4 6 16 14 5 11 2 12 24 9 1 13 3	IncQ1			tet(B) sul2 aph(3'')-Ib aph(6)-Id blaTEM-1		mdsA mdsB	merR merT merP merC golS golT pcoS pcoR pcoD pcoC pcoA silP silA silB silF silC silR silS silE arsC arsB arsA arsD arsR fieF		CP082496-CP082499
						pF18S014-1	101704	Y		IncI1-I(Gamma)	IncI		blaCMY-2
						pF18S014-2	5698	Y		ColRNAI	Col
						pF18S014-3	3373	Y			Unknown
F18S015	FSIS1607501	Brandenburg	Cecal swine	CA	2016	chromosome	4661487	Y	3 13 1 9 24 18 2 11 5 16 6 4						mdsA mdsB	golS golT fieF		CP082464-CP082467
						pF18S015-1	293413	Y		IncHI2 IncHI2A	IncH		catA2 blaTEM-1 sul2 blaSHV-12 catA2 tet(D) aac(6')-Ib3 aph(3')-Ia mcr-9.1 aac(6')-IIc aac(3)-II arr ere(A) sul1	qacEdelta1		merR merT merA merD merE terD terZ terW arsC pcoS
						pF18S015-2	3629	Y		ColRNAI	Col
						pF18S015-3	3830	Y		Col440I	Col
F18S016	FSIS1607502	Cerro	Cecal chicken	SC	2016	chromosome	4547176	Y	3 13* 1 9 24 11 2 12 5 16 6 4						mdsA mdsB	golS golT fieF		CP082902-CP082903
						pF18S016-qnr	7621	Y		IncQ2	IncQ		qnrS2
F18S017	FSIS1607563	Agona	Cecal turkey	MN	2016	chromosome	5004346	Y	3 8 1 9 24 23 11 2 12 19 5 16 6 4				fosA7.2		mdsA mdsB	golS golT fieF		CP082456-CP082463
						pF18S017-1	102320	Y		IncC	IncC		blaCMY-2 aph(3')-Ia floR tet(A) aph(6)-Id aph(3'')-Ib sul2			merB merA merP merT merR
						pF18S017-3749	3749	Y		Col156	Col
						pF18S017-4657	4657	Y		Col(pHAD28)	Col
						pF18S017-3003	3003	Y		Col440I	Col
						pF18S017-4087	4087	Y			Unknown
						pF18S017-2285	2285	Y			Unknown
						pF18S017-4074	4074	Y			Unknown
F18S018	FSIS1607717	Meleagridis	Cecal cattle	TX	2016	chromosome-p1	3488843	N	6 4 3 8 15 1 9 24				fosA7.4 aac(2')-IIa		mdsA mdsB	golS golT fieF		AANPKS000000000
						chromosome-p2	983053	N	2 12
						chromosome-p3	437364	N	11 5
						pF18S018	45789	Y		IncX1	IncX		sul2 aph(3'')-Ib aph(6)-Id tet(A) floR floR
F18S019	FSIS1607821	Uganda	Cecal turkey	MN	2016	chromosome	4925510	Y	3 13 1 9 24 12 5 11 2 14 6 4						mdsA mdsB	golS golT fieF		CP082490-CP082495
						pF18S019-1	240801	Y		IncHI2 IncHI2A	IncH		aph(6)-Id aph(3'')-Ib aac(3)-IVa aph(4)-Ia			silE silS silR silC silF silB silA silP pcoA pcoB pcoC pcoD pcoR pcoS terW terZ terD
						pF18S019-2	8274	Y			Unknown		blaTEM-1
						pF18S019-4773	4773	Y		Col(pHAD28)	Col
						pF18S019-4074	4074	Y			Unknown
						pF18S019-5_3371	3371	Y			Unknown
F18S020	FSIS1607861	Muenster	Cecal cattle	TX	2016	chromosome	4745625	Y	3 10 13 1 9 24 23 18 2 11 5 14 6 4						mdsA mdsB	golS golT fieF		CP082453-CP082455
						pF18S020	70300	Y		IncR	IncR		floR aph(6)-Id aph(3'')-Ib sul2 sul1 aadA2 dfrA12 tet(A) aph(3'')-Ib aph(6)-Id	qacEdelta1
						pF18S020-qnr	2699	Y		Col(pHAD28)	Col		qnrB19
F18S021	FSIS1607862	Montevideo	Cecal cattle	TX	2016	chromosome	4592768	N	3 13 1 9 24 18 2 11 5 14 16 6 4				fosA7		mdsA mdsB	golS golT fieF		CP082451-CP082452
						pF18S021	148008	Y		IncC	IncC		floR tet(A) aph(6)-Id aph(3'')-Ib sul2 blaCMY-2			merR merT merP merA merB merD merE
F18S022	FSIS1607968	Montevideo	Cecal swine	KY	2016	chromosome	4663049	Y	3 13 1 9 24 18 2 11 5 14 16 17 6 4				fosA7		mdsA mdsB	golS golT fieF		CP082449-CP082450
						pF18S022	160232	Y		IncC	IncC		tet(M) ant(2'')-Ia aadA2 cmlA6 aadA15 floR tet(A) aph(6)-Id aph(3'')-Ib sul2 blaCMY-2	qacEdelta1		merR merT merP merA merB merD merE
F18S023	FSIS1608038	Johannesburg	Cecal swine	IA	2016	chromosome	4704412	Y	4 6 14 5 11 2 18 24 9 12 1 13 3						mdsA mdsB	fieF golT golS pcoE pcoS pcoR pcoD pcoC pcoB pcoA silP silA silB silF silC silR silS silE		CP082442-CP082448
						pF18S023-1	292686	Y		IncHI2 IncHI2A	IncH		bleO blaTEM-1 aph(4)-Ia aac(3)-IVa aph(3')-Ia sul1 aadA7 tet(B)	qacEdelta1		pcoE pcoS pcoR pcoD pcoC pcoB pcoA silB silF silC terD terZ terW pcoE pcoS pcoR pcoD pcoC pcoB pcoA
						pF18S023-3071	3071	Y		Col(pHAD28)	Col		qnrB19
						pF18S023-2319	2319	Y		Col440I	Col
						pF18S023-3223	3223	Y			Unknown
						pF18S023-3811	3811	Y		Col440I	Col
						pF18S023-2364	2364	Y		Col(pHAD28)	Col
F18S024	FSIS1608364	Newport	Cecal cattle	WA	2016	chromosome	4933465	Y	3 13 1 9 24 12 2 11 5 14 16 6 4						mdsA mdsB	golS golT fieF		CP082439-CP082441
						pF18S024-1	123445	Y		IncC	IncC		floR tet(A) aph(6)-Id aph(3'')-Ib sul2 blaCMY-2 blaCMY-2
						pF18S024-2	4593	Y		ColRNAI	Col
F18S025	FSIS1608368	Montevideo	Cecal cattle	WI	2016	chromosome	4652872	Y	3 13 1 9 24 18 2 11 5 14 16 6 4				fosA7		mdsA mdsB	golS golT fieF		CP082436-CP082438
						pF18S025-1	146222	Y		IncC	IncC		floR tet(A) aph(6)-Id aph(3'')-Ib sul2 blaCMY-2 dfrA12 aadA2 sul1	qacEdelta1
						pF18S025-2	48618	Y		IncFII(p96A)	IncF
F18S026	FSIS1608545	Senftenberg	Cecal turkey	MN	2018	chromosome	4836454	N	11 2 12 5 16 6 4 3 8 1 9 24				sul1 aadA1 tet(A) aph(6)-Id aph(3'')-Ib aph(3')-Ia	qacEdelta1	mdsA mdsB	golS golT fieF merE merD merF merP merT merR silE silS silR silC silF silB silA silP pcoA pcoB pcoC pcoD pcoR pcoS pcoE		CP082434-CP082435
						pF18S026	107730	Y		IncI1-I(Gamma)	IncI		blaCMY-2
F18S027	FSIS1608547	Agona	Cecal turkey	NC	2016	chromosome	4805898	N	24 9 1 8 3 4 6 16 5 19 12 2 11 23				fosA7.2		mdsB mdsA	fieF golT golS		CP082431-CP082433
						pF18S027-1	97587	Y		IncN IncFIB(K)	Combination		aph(6)-Id aph(3'')-Ib sul1 aac(3)-VIa aadA1 blaHER-3	qacEdelta1		silE silS silR silC silF silB silA silP
						pF18S027-2	5284	Y			Unknown
F18S028	FSIS1609224	Typhimurium	Cecal cattle	CA	2016	chromosome	4933400	Y	3 13 1 9 24 12 2 11 5 14 16 6 4				sul1 blaCARB-2 tet(G) floR sul1 aadA2	qacEdelta1 qacEdelta1	mdsA mdsB	golS golT fieF		CP082429-CP082430
						pF18S028	96028	Y		IncFII(S) IncFIB(S)	IncF	spvRABCD
F18S029	FSIS1609398	Derby	Cecal swine	NE	2016	chromosome	4903909	Y	3 13* 1 9 24 8/13 12 11 2 12 5 16 6 4				fosA7.3		mdsA mdsB	golS golT fieF		CP082426-CP082428
						pF18S029-1	235922	N		IncHI2 IncHI2A	IncH		aph(6)-Id aph(3'')-Ib aac(3)-IVa aph(4)-Ia tet(B)			terW terZ terD silE silS silR silC silF silB silA silP pcoA pcoB pcoC pcoD pcoR pcoS pcoE
						pF18S029-2	158456	Y		IncC	IncC		blaCMY-2 sul2 aph(3'')-Ib aph(6)-Id tet(A) floR	qacG2		merT merP merC
F18S030	FSIS1609549	I 4,[5],12:i:-	Cecal swine	IN	2016	chromosome-p1	4179611	N	4 6 16 14 5 11 2 12 24 9 1 13 3				tet(B)		mdsB mdsA	golT golS merC merP merT merR fieF		AANVAB000000000
						chromosome-p2	882677	N								arsR arsD arsA arsB arsC silE silS silR silC silF silB silA silP pcoA pcoC pcoD pcoR pcoS
						pF18S030-1	36990	Y		IncX4	IncX		blaCMY
						pF18S030-2_circular	17931	Y		IncP6	IncP		mph(E) msr(E)
F18S031	FSIS11704063	Typhimurium	Cecal swine	MN	2017	chromosome	4889512	Y	4 6 16 14 5 11 2 12 24 9 1 13 3				sul1 blaCARB-2 tet(G) floR sul1 aadA2	qacEdelta1 qacEdelta1	mdsA mdsB	golS golT fieF		CP082421-CP082425
						pF18S031-1	326167	Y		IncHI1A(pNDM-CIT) IncHI1B(pNDM-CIT)	IncH		catA1 aac(3)-IVa aph(3')-Ia aph(3')-Ia aph(3')-Ia aph(3')-Ia mph(A) sul1 aadA2 dfrA12	qacEdelta1		merR merT merP merC arsC terD terZ terW
						pF18S031-2	94070	Y		IncFIB(S) IncFII(S) IncFII(S)	IncF	spvRABCD
						pF18S031-3	4074	Y			Unknown
						pF18S031-4	3188	Y		Col440I	Col
F18S032	FSIS11704067	I 4,[5],12:i:-	Cecal swine	MN	2017	chromosome	5010982	Y	4 6 16 14 5 11 2 12 24 9 1 13 3	IncQ1			tet(B) sul2 aph(3'')-Ib aph(6)-Id blaTEM-1		mdsA mdsB	merR merT merP merC golS golT pcoS pcoR pcoD pcoC pcoA silP silA silB silF silC silR silS silE arsC arsB arsA arsD arsR fieF		CP082417-CP082420
						pF18S032-1	276582	Y		IncHI2 IncHI2A	IncH		catA2 sul2 sul1 ere(A) arr aac(3)-II aac(6')-IIc aph(3')-Ia mcr-9.1 blaTEM-1	qacEdelta1		arsC pcoS merR merT merA merD merE terD terZ terW
						pF18S032-2	4593	Y		ColRNAI	Col
						pF18S032-3	3830	Y		Col(pHAD28)	Col
F18S033	FSIS11704575	Heidelberg	Cecal chicken	GA	2017	chromosome	4841713	Y	3 13 1 9 24 12 2 11 5 14 16 6 4				cmlA5 ant(2'')-Ia tet(A) aph(6)-Id aph(3'')-Ib sul2 fosA7	qacEdelta1	mdsA mdsB	silE silS silR silC silF silB silA silP pcoA pcoB pcoC pcoD pcoR pcoS pcoE arsR golS golT fieF		CP082415-CP082416
						pF18S033	36035	Y		IncX1	IncX
F18S034	FSIS11704880	Derby	Cecal swine	IA	2017	chromosome	4900578	Y	4 6 16 5 12 2 11 23 24 9 1 13* 3				oqxB oqxA bleO tet(A) fosA7.3		mdsB mdsA	merP merT merR pcoE pcoS pcoR pcoD pcoC pcoB pcoA silP silA silB silF silC silR silS silE golT golS fieF		CP082411-CP082414
						pF18S031-1	5686	Y		ColRNAI	Col
						pF18S031-2	3374	Y			Unknown
						pF18S031-3	1888	Y		Col440I	Col
F18S035	FSIS11705512	Agona	Cecal swine	MO	2017	chromosome	4896634	Y	3 8 1 9 24 23 11 2 12 19 5 16 6 4				fosA7.2		mdsA mdsB	golS golT fieF		CP082409-CP082410
						pF18S035	180904	Y		IncC	IncC		sul1 rmtE1 aph(3')-Ia tet(A) aph(6)-Id aph(3'')-Ib sul2 blaCMY-2 aadA6 aac(3)-VIa sul1 dfrA34 aph(3')-Ia	qacEdelta1 qacEdelta1		merB merA merP merT merR
F18S036	FSIS11705518	Ohio	Cecal swine	WI	2017	chromosome	4861909	Y	12 2 11 5 16 6 4 3 8 1 9 24						mdsA mdsB	golS golT pcoE pcoS pcoR pcoD pcoC pcoB pcoA silP silA silB silF silC silR silS silE fieF		CP082406-CP082408
						pF18S036-1	172678	Y		IncC	IncC		dfrA1 sul1 aph(3')-Ia blaTEM-1 cmlA5 ant(2'')-Ia floR tet(A) aph(6)-Id aph(3'')-Ib sul2 blaCMY-2	qacEdelta1 qacEdelta1		merE merD merB merA merP merT merR
						pF18S036-2	3830	Y			Unknown
F18S037	FSIS11705856	Dublin	Cecal cattle	CA	2017	chromosome	4843960	Y	3 13 1 9 24 17 12 23 11 2 19 5 14 16 6 10 4						mdsA mdsB	golS golT fieF		CP082403-CP082405
						pF18S037-1	109048	Y		IncC	IncC		floR floR tet(A) aph(6)-Id aph(3'')-Ib sul2 blaCMY-2 blaTEM			merE merD merB merA merP merT merR
						pF18S037-2	74851	Y		IncX1 IncFII(S)	Combination	spvRABCD
F18S038	FSIS11705858	Anatum	Cecal cattle	TX	2017	chromosome	4831547	Y	3 13 1 9 24 12 2 11 5 23 14 6 10 4						mdsA mdsB	golS golT fieF		CP082396-CP082402
						pF18S038-1	12059	Y		IncQ1	IncQ		erm(42)
						pF18S038-2	4612	Y		Col(pHAD28)	Col
						pF18S038-3	4075	Y		Col(pHAD28)	Col
						pF18S038-4	3101	Y			Unknown
						pF18S038-5	2894	Y			Unknown
						pF18S038-6	2300	Y			Unknown
F18S039	FSIS11706780	Heidelberg	Cecal swine	IL	2017	chromosome	4881640	Y	3 13 1 9 24 12 2 11 5 14 16 6 4				fosA7		mdsA mdsB	arsR golS golT fieF		CP082394-CP082395
						pF18S039	288602	Y		IncHI2 IncHI2A IncC	Combination		aph(6)-Ic ble aph(3')-IIa floR tet(A) aph(6)-Id aph(3'')-Ib sul2 blaCMY-2 aph(6)-Id aph(3'')-Ib tet(B)			terW pcoE pcoS pcoR pcoD pcoC pcoB pcoA silP silA silB silF silC silR silS silE terD terZ
F18S040	FSIS1700433	I 4,[5],12:i:-	Cecal swine	IA	2017	chromosome	5046833	Y	3 13 1 9 24 12 2 11 5 14 16 6 4	IncQ1			tet(B) sul2 aph(3'')-Ib aph(6)-Id blaTEM-1		mdsA mdsB	merR merT merP merC golS golT pcoS pcoR pcoD pcoC pcoA silP silA silB silF silC silR silS silE arsC arsB arsA arsD arsR fieF		CP082391-CP082393
						pF18S040-1	89721	N		IncA	IncA		mph(E) msr(E) armA sul1 aac(6')-Ib-cr5	qacEdelta1
						pF18S040-2	14501	Y		ColRNAI	Col		aph(3')-Ia aph(3')-Ia
F18S041	FSIS1700566	Infantis	Cecal cattle	WA	2017	chromosome	4660612	Y	3 13 1 9 24 12 2 11 5 14 16 6 4						mdsA mdsB	arsR golS golT fieF		CP082389-CP082390
						pF18S041	101996	Y		IncI1-I(Gamma)	IncI		tet(A) blaSHV
F18S042	FSIS1701482	Reading	Cecal turkey	AR	2017	chromosome	4647476	Y	3 13 1 9 24 18 2 11 5 14 16 6 4						mdsA mdsB	golS golT fieF		CP082386-CP082388
						pF18S042-1	11038	Y		IncQ1	IncQ		aph(6)-Id tet(A) sul2 aph(3'')-Ib
						pF18S042-2	10511	Y		Col440II	Col		blaTEM-1
F18S043	FSIS1701601	I 4,[5],12:i:-	Cecal swine	IL	2017	chromosome	4998621	Y	3 13 1 9 24 12 2 11 5 14 16 6 4	IncQ1			tet(B) sul2 aph(3'')-Ib aph(6)-Id blaTEM-1		mdsA mdsB	merR merT merP merC golS golT pcoS pcoR pcoD pcoC pcoA silP silA silB silF silC silR silS silE arsC arsB arsA arsD arsR fieF		CP082384-CP082385
						pF18S043	102674	Y		IncFII(29)	IncF		mef(B) sul3 aadA1 cmlA1 aadA2 dfrA12	qacL
F18S044	FSIS1702037	Bredeney	Cecal swine	IL	2017	chromosome	4612872	Y	4 6 16 14 5 11 2 18 24 9 1 13 3							fieF golT golS	sinH	CP082379-CP082383
						pF18S044-1	271934	Y		IncHI2 IncHI2A	IncH		tet(B) blaTEM-1 bleO aph(4)-Ia aac(3)-IVa sul1 aadA7	qacEdelta1		fieF terD terZ terW silE silS silR silC silF silB silA silP pcoA pcoB pcoC pcoD pcoR pcoS pcoE
						pF18S044-2	70077	N			Unknown
						pF18S044-3	16372	Y		IncFIA(HI1)	IncF		aph(3'')-Ib aph(6)-Id tet(A)
						pF18S044-4	3071	Y		Col(pHAD28)	Col		qnrB19
F18S045	FSIS1702343	I 4,[5],12:i:-	Cecal turkey	UT	2017	chromosome	4867843	Y	3 13 1 9 24 12 2 11 5 14 16 6 4	IncQ1			tet(B) sul2 aph(3'')-Ib aph(6)-Id blaTEM-1		mdsA mdsB	merR merT merP merC golS golT fieF		CP082376-CP082378
						pF18S045-1	163707	Y		IncFIB(AP001918) IncFII(29) FIA(pBK30683)	IncF		blaTEM-1				iutA iucA iss iroE iroN mchF cvaC tsh
						pF18S045-2	107650	Y		IncI1-I(Gamma)	IncI		sul1 aac(3)-VIa aadA1	qacEdelta1			sinH
F18S046	FSIS1702507	Agona	Cecal swine	CA	2017	chromosome	4933270	Y	3 8 1 9 24 23 11 2 12 19 5 16 6 4				fosA7.2		mdsA mdsB	golS golT fieF		CP082488-CP082489
						pF18S046	124158	Y		IncC	IncC		floR tet(A) aph(6)-Id aph(3'')-Ib sul2 blaCMY-2			merB merA merP merT merR
F18S047	FSIS1702508	Typhimurium	Cecal cattle	TN	2017	chromosome	4866081	Y	3 13 1 9 24 12 2 11 5 14 16 6 4						mdsA mdsB	golS golT fieF		CP082374-CP082375
						pF18S047	115513	N		IncC	IncC		floR tet(A) aph(6)-Id aph(3'')-Ib sul2 blaCMY-2			merE merD merB merA merP merT merR
F18S048	FSIS1703084	Infantis	Cecal swine	NE	2017	chromosome	4866081	Y	3 13 1 9 24 12 2 11 5 14 16 6 4						mdsA mdsB	arsR golS golT fieF		CP082372-CP082373
						pF18S048	157473	Y		IncC	IncC		floR tet(A) aph(6)-Id aph(3'')-Ib sul2 blaCMY-2 aadA6 aac(3)-VIa sul1 dfrA34 aph(3')-Ia blaTEM	qacEdelta1
F18S049	FSIS1710858	Hadar	Cecal chicken	DE	2017	chromosome	4720813	Y	3 13 1 9 24 12 2 11 5 14 16 6 4				aph(3'')-Ib aph(6)-Id tet(A)		mdsA mdsB	golS golT fieF		CP082370-CP082371
						pF18S049	113177	N		IncI1-I(Gamma)	IncI		sul1 aac(3)-VIa aadA1	qacEdelta1
N16S021	N/A	Typhimurium	Retail chicken	CT	2016	chromosome	4880666	Y	3 13 1 9 24 12 2 11 5 14 16 6 4				blaCMY-2		mdsA mdsB	golS golT fieF		CP082751-CP082752
						pN16S021	231747	Y		IncC	IncC		tet(A) sul2			merR	ybtQ ybtP
N16S065	N/A	Kentucky	Retail chicken	NM	2016	chromosome	4773852	Y	3 8 1 9 24 12 2 11 5 16 6 4						mdsA mdsB	golS golT fieF		CP082747-CP082750
						pN16S065-1	146790	Y		IncFIB(AP001918) IncFII	IncF		aph(6)-Id aph(3'')-Ib tet(B)				iutA iucA iss iroE iroN mchF cvaC
						pN16S065-2	114503	Y		IncB/O/K/Z	IncB/O/K/Z		blaCMY-2 aadA1 aac(3)-VIa sul1	qacEdelta1		merC merP merT merR
						pN16S065-3	46118	Y		IncX1	IncX
N16S070	N/A	Typhimurium	Retail chicken	NM	2016	chromosome	4850646	Y	3 13 1 9 24 12 2 11 5 14 16 6 4				blaCMY-2		mdsA mdsB	golS golT fieF		CP082739-CP082746
						pN16S070-1	189396	Y		IncC	IncC		sul2 tet(A)			merR	ybtQ ybtP
						pN16S070-2	42619	Y		IncX1	IncX
						pN16S070-3	4674	Y		Col(pHAD28)	Col
						pN16S070-4	4633	Y		ColRNAI	Col
						pN16S070-5	3253	Y			Unknown
						pN16S070-6	2096	Y		ColpVC	Col
N16S074	N/A	Heidelberg	Retail chicken	NY	2016	chromosome	4751723	Y	3 13 1 9 24 12 2 11 5 14 16 6 4				fosA7		mdsA mdsB	arsR golS golT fieF		CP082736-CP082738
						pN16S074-1	144357	Y		IncC	IncC		blaTEM-1 cmlA5 ant(2'')-Ia blaCMY-2 sul2 aph(3'')-Ib aph(6)-Id tet(A) floR	qacEdelta1		merE merD merB merA merP merT merR
						pN16S074-2	37697	Y		IncX1	IncX
N16S084	N/A	Reading	Retail turkey	NY	2016	chromosome	4677047	Y	3 13 1 9 24 18 2 11 5 14 16 6 4						mdsA mdsB	golS golT fieF		CP082733-CP082735
						pN16S084-1	87408	Y		IncFIB(K)	IncF		aadA1 aac(3)-VIa sul1 blaHER-3 aph(3'')-Ib aph(6)-Id	qacEdelta1		silA silB silF silC silR silS silE
						pN16S084-2	11046	Y		IncQ1	IncQ		sul2 aph(3'')-Ib aph(6)-Id tet(A)
N16S089	N/A	Typhimurium	Retail chicken	NY	2016	chromosome	4854709	Y	3 13 1 9 24 12 2 11 5 14 16 6 4				blaCMY-2		mdsA mdsB	golS golT fieF		CP082662-CP082665
						pN16S089-1	159498	N		IncC	IncC		tet(A) sul2			merR	ybtQ ybtP
						pN16S089-2	107020	Y		IncFIB(pHCM2)	IncF
						pN16S089-3	6836	Y		ColRNAI	Col
N16S098	N/A	Heidelberg	Retail chicken	PA	2016	chromosome	4837915	Y	4 6 16 14 5 11 2 12 24 9 1 13 3				fosA7 blaCMY-2		mdsA mdsB	fieF golT golS arsR	sinH	CP082658-CP082661
						pN16S098-1	175555	N		IncA	IncA		aadA1 aac(3)-VIa sul1 aph(6)-Id aph(3'')-Ib tet(B)	qacEdelta1		merR merT merA merD merE
						pN16S098-2	40085	Y		IncX1	IncX
						pN16S098-3	11385	N			Unknown
N16S104	N/A	Kentucky	Retail chicken	PA	2016	chromosome	4769683	Y	4 6 16 5 11 2 12 24 9 1 8 3						mdsA mdsB	golS golT fieF		CP082654-CP082657
						pN16S104-1	145996	Y		IncFII IncFIB(AP001918)	IncF		tet(B) aph(3'')-Ib aph(6)-Id				cvaC mchF iroN iroE iss iucA iutA
						pN16S104-2	98996	Y		IncI1-I(Gamma)	IncI		blaCMY-2
						pN16S104-3	46120	Y		IncX1	IncX
N16S132	N/A	Typhimurium	Retail pork	MD	2016	chromosome	4962998	Y	3 13 1 9 24 12 2 11 5 14 16 6 4				sul1 blaCARB-2 tet(G) floR sul1 aadA2	qacEdelta1 qacEdelta1	mdsA mdsB	golS golT fieF		CP082652-CP082653
						pN16S132	58472	N			Unknown	spvRABCD
N16S144	N/A	I 4,[5],12:i:-	Retail turkey	OR	2016	chromosome	4998648	Y	3 13 1 9 24 12 2 11 5 14 16 6 4	IncQ1			tet(B) sul2 aph(3'')-Ib aph(6)-Id blaTEM-1		mdsA mdsB	merR merT merP merC golS golT pcoS pcoR pcoD pcoC pcoA silP silA silB silF silC silR silS silE arsC arsB arsA arsD arsR fieF		CP082650-CP082651
						pN16S144	70983	Y		IncN IncN	IncN		sul1 aac(3)-VIa aadA1	qacEdelta1
N16S189	N/A	Typhimurium	Retail chicken	PA	2016	chromosome	4811729	Y	3 13 1 9 24 12 2 11 5 14 16 6 4				blaCMY-2		mdsA mdsB	golS golT fieF		CP082647-CP082649
						pN16S189-1	142512	N		IncC	IncC		tet(A) sul2 aph(3')-Ia			merR	ybtP ybtQ
						pN16S189-2	101040	N		IncI1-I(Gamma)	IncI		blaCMY-2
N16S201	N/A	Heidelberg	Retail turkey	LA	2016	chromosome-p1	4735735	N	12 24 9 1 13 3 4 6 16 14 5 11				fosA7		mdsB mdsA	arsR fieF golT golS		AAMWSB000000000
						chromosome-p2	55491	N	2
						pN16S201-1	313318	Y		IncC IncI1(Gamma)	Combination		blaCMY-2 aph(3')-Ia sul2 aadA1 tet(A) blaTEM-1			merR	ybtQ ybtP
N16S214	N/A	Typhimurium	Retail chicken	CO	2016	chromosome	4768418	Y	3 13 1 9 24 12 2 11 5 14 16 6 4				blaCMY-2		mdsA mdsB	golS golT fieF		CP082645-CP082646
						pN16S214	174026	Y		IncC	IncC		tet(A) sul2			merR
N16S224	N/A	Newport	Retail turkey	CA	2016	chromosome	4831349	Y	3 13 1 9 24 12 11 5 14 16 6 4						mdsA mdsB	golS golT fieF		CP082641-CP082644
						pN16S224-1	71790	N		IncI1-I(Gamma)	IncI
						pN16S224-2	51607	N		IncC	IncC					merE merD merB merA merP merT merR
						pN16S224-2_2	27744	N					sul2 aph(3'')-Ib aph(6)-Id tet(A) floR
N16S244	N/A	Agona	Retail pork	MD	2016	chromosome-p1	2904451	N	4 6 16 5 19 12 2 11 23				fosA7.2		mdsB mdsA	fieF golT golS		AAMWQP000000000
						chromosome-p2	2068843	N	24 9 1 8 3
						pN16S244	136463	Y		IncC	IncC		floR tet(A) aph(6)-Id aph(3'')-Ib sul2 blaCMY-2			merB merA merP merT merR
N16S275	N/A	Dublin	Retail beef	MD	2016	chromosome-p2	3653642	N	12 17 24 9 1 13						mdsA mdsB	golS golT fieF		AAMWQB000000000
						chromosome-p1	1167927	N	23 11 2 19 5 14 16 6 10 4 3
						pN16S275	159851	Y		IncC IncX1 IncFII(S)	Combination	spvRABCD	floR tet(A) aph(6)-Id aph(3'')-Ib sul2 blaCMY-2
N16S319	N/A	Alachua	Retail turkey	NM	2016	chromosome-p1	3427243	N	12 2 11 5 16 6 4 3				fosA7.8 sul1 aadA1 tet(A) aph(6)-Id aph(3'')-Ib	qacEdelta1	mdsA mdsB	golS golT pcoE pcoS pcoR pcoD pcoC pcoB pcoA silP silA silB silF silC silR silS silE fieF merE merD merF merP merT merR		AAPXKA000000000
						chromosome-p2	1579345	N	8 1 9 24
						pN16S319-1	128226	Y		IncFII IncFIB(AP001918)	IncF						cvaC iroN iroE iss iucA iutA
						pN16S319-2	121303	Y		IncI1-I(Gamma)	IncI		blaCMY-2 aadA1 aac(3)-VIa sul1	qacEdelta1
N17S016	N/A	Typhimurium	Retail pork	GA	2017	chromosome	4906338	Y	3 13 1 9 24 12 2 11 5 14 16 6 4				sul1 blaCARB-2	qacEdelta1	mdsA mdsB	golS golT fieF		CP082670-CP082673
						pN17S016-1	113629	Y		IncI1-I(Gamma)	IncI					silE silS silR silC silF silB silA silP pcoA pcoB pcoC pcoD pcoR pcoS pcoE
						pN17S016-2	91278	Y		Phage like	Phage-like
						pN17S016-3	101612	Y		IncFIB(S) IncFII(S)	IncF	spvRABCD
N17S056	N/A	I 4,[5],12:i:-	Retail turkey	IA	2017	chromosome	4999760	Y	3 13 1 9 24 12 2 11 5 14 16 6 4	IncQ1			tet(B) sul2 aph(3'')-Ib aph(6)-Id blaTEM-1		mdsA mdsB	merR merT merP merC golS golT pcoS pcoR pcoD pcoC pcoA silP silA silB silF silC silR silS silE arsC arsB arsA arsD arsR fieF		CP082609-CP082610
						pN17S056-R-plasmid	117591	Y		IncI1-I(Gamma)	IncI		blaTEM-1 tet(A) aadA1 aac(3)-IId
N17S107	N/A	I 4,[5],12:i:-	Retail turkey	LA	2017	chromosome	4919556	Y	3 13 1 9 24 12 2 11 5 14 16 6 4	IncQ1			tet(B) sul2 aph(3'')-Ib aph(6)-Id blaTEM-1		mdsA mdsB	merR merT merP merC golS golT fieF		CP082608
N17S111	N/A	Enteritidis	Retail chicken	LA	2017	chromosome	4679495	Y	3 13 1 9 24 17 12 23 11 2 19 5 14 16 6 10 4						mdsA mdsB	golS golT fieF		CP082729-CP082732
						pN17S111-1	38612	N		IncX1	IncX		blaTEM-1
						pN17S111-2	57574	Y		IncN IncN	IncN		aph(6)-Id aph(3'')-Ib sul2 tet(A) blaTEM-1
						pN17S111-3	59482	Y		IncFII(S) IncFIB(S)	IncF	spvRABCD
N17S129	N/A	Muenchen	Retail turkey	MD	2017	chromosome	4833657	Y	3 13 1 9 24 12 2 11 5 14 16 6 4						mdsA mdsB	golS golT fieF		CP082727-CP082728
						pN17S129	11035	Y		IncQ1	IncQ		sul2 aph(3'')-Ib aph(6)-Id tet(A)
N17S146	N/A	I 4,[5],12:i:-	Retail turkey	MN	2017	chromosome-p1	3876476	N	6 16 14 5 11 2 12 24 9 1 13 3	IncQ1			sul2 tet(B)		mdsB mdsA	golT golS merC merP merT merR		AACXAV000000000
						chromosome-p2	1054331	N	4							fieF
						pN17S146	121412	Y		IncI1-I(Gamma)	IncI		tet(A)
N17S166	N/A	I 4,[5],12:r:-	Retail turkey	MN	2017	chromosome	4997193	Y	3 13 1 9 24 12 2 11 5 14 16 6 4				mcr-9.1 aadA1 aac(3)-VIa sul1 fosA7 ()	qacEdelta1	mdsA mdsB	arsR pcoS arsC golS golT fieF		CP082668-CP082669
						pN17S0166	99345	Y		IncI1-I(Gamma)	IncI		tet(B)
N17S192	N/A	Enteritidis	Retail chicken	MO	2017	chromosome	4679415	Y	3 13 1 9 6 16 14 5 19 2 11 23 12 17 24 10 4						mdsB mdsA	golT golS fieF		CP082726
N17S266	N/A	Berta	Retail turkey	NY	2017	chromosome	4818499	Y	3 13 1 9 24 17 12 11 2 19 5 14 16 6 10 4						mdsA mdsB	golS golT fieF		CP082723-CP082725
						pN17S266-1	53499	Y		IncI1-I(Gamma)	IncI		tet(B)
						pN17S266-2	39055	Y		IncX1	IncX
N17S288	N/A	Reading	Retail turkey	NY	2017	chromosome	4647482	Y	3 13 1 9 24 18 2 11 5 14 16 6 4						mdsA mdsB	golS golT fieF		CP082721-CP082722
						pN17S0288	11038	Y		IncQ1	IncQ		sul2 aph(3'')-Ib aph(6)-Id tet(A)
N17S312	N/A	Hadar	Retail turkey	PA	2017	chromosome	4755540	Y	3 13 1 9 24 12 2 11 5 14 16 6 4						mdsA mdsB	golS golT fieF		CP082720
N17S323	N/A	Kentucky	Retail chicken	PA	2017	chromosome	4769669	Y	3 8 1 9 24 12 11 5 16 6 4						mdsA mdsB	golS golT fieF		CP082716-CP082719
						pN17S323-1	98995	Y		IncI1-I(Gamma)	IncI		blaCMY-2
						pN17S323-2	46122	Y		IncX1	IncX
						pN17S0323-3	145996	Y		IncFII IncFIB(AP001918)	IncF		tet(B) aph(3'')-Ib aph(6)-Id				cvaC mchF iroN iroE iss iucA iutA
N17S334	N/A	Berta	Retail turkey	SC	2017	chromosome	4918599	Y	3 13 7 1 9 24 17 12 11 2 19 5 14 16 6 10 4						mdsA mdsB	golS golT fieF		CP082714-CP082715
						pN17S0334	106824	Y		IncI1-I(Gamma)	IncI		aadA1 aac(3)-VIa sul1	qacEdelta1
N17S347	N/A	London	Retail turkey	SC	2017	chromosome	4738362	Y	4 6 14 5 11 2 12 24 9 1 13 3						mdsB mdsA	fieF golT golS		CP082711-CP082713
						pN17S0347-1	261844	Y		IncHI2 IncHI2A	IncH		tet(B)			terZ terW pcoE pcoS pcoR pcoD pcoC pcoB pcoA silP silA silB silF silC silR silS silE arsC arsB arsA arsD terD
						pN17S0347-2	97948	N		IncI1-I(Gamma)	IncI		sul1 aac(3)-VIa aadA1	qacEdelta1
N17S367	N/A	London	Retail turkey	SC	2017	chromosome	4738458	Y	3 13 1 9 24 12 2 11 5 14 6 4						mdsA mdsB	golS golT fieF		CP082709-CP082710
						pN17S0367	113501	Y		IncI1-I(Gamma)	IncI		sul1 aac(3)-VIa aadA1 blaHER-3	qacEdelta1
N17S380	N/A	I 4,[5],12:i:-	Retail turkey	TN	2017	chromosome	4919561	Y	3 13 1 9 24 12 2 11 5 14 16 6 4	IncQ1			tet(B) sul2 aph(3'')-Ib aph(6)-Id blaTEM-1		mdsA mdsB	merR merT merP merC golS golT fieF		CP082706-CP082708
						pN17S0380-1	121158	N		IncI1-I(Gamma)	IncI		tet(A)
						pN17S0380-2	5559	Y		Col156	Col
N17S520	N/A	Typhimurium	Retail turkey	GA	2017	chromosome	4992328	Y	3 13 1 9 24 12 2 11 5 14 16 6 4				sul1 aac(3)-VIa aadA1 tet(C) sul2 tet(A)	qacEdelta1	mdsA mdsB	silE silS silR silC silF silB silA silP merR merT merA merD merE terD terZ terW golS golT merR fieF		CP082704-CP082705
						pN17S0520	100508	Y		IncI1-I(Gamma)	IncI		blaCMY-2
N17S546	N/A	Reading	Retail turkey	IA	2017	chromosome	4647487	Y	3 13 1 9 24 18 2 11 5 14 16 6 4						mdsA mdsB	golS golT fieF		CP082701-CP082703
						pN17S0546-1	11036	Y		IncQ1	IncQ		tet(A) aph(6)-Id aph(3'')-Ib sul2
						pN17S0546-2	10510	Y		Col440II	Col		blaTEM-1
N17S620	N/A	Typhimurium	Retail beef	KS	2017	chromosome	4870548	Y	3 13 1 9 24 12 2 11 5 14 16 6 4						mdsA mdsB	golS golT fieF		CP082606-CP082607
						pN17S0620	106003	Y		IncC	IncC		floR floR tet(A) aph(6)-Id aph(3'')-Ib sul2 blaCMY-2			merE merD merB merA merP merT merR
N17S834	N/A	Senftenberg	Retail turkey	SC	2017	chromosome-p1	4929635	N	11 2 12 5 16 6 4 3 8 1 9 24				aph(3'')-Ib aph(6)-Id tet(A) dfrA5 sul1	qacEdelta1	mdsA mdsB	golS golT fieF merR merT merP silE silS silR silC silF silB silA silP pcoA pcoB pcoC pcoD pcoR pcoS pcoE		AACXBX000000000
						chromosome-p2	62018	N
N17S914	N/A	Kentucky	Retail chicken	GA	2017	chromosome	4754815	N	16 6 4 3 8 1 9 24 12 2 11 5						mdsA mdsB	golS golT fieF		CP082602-CP082605
						pN17S0914-1	146007	Y		IncFIB(AP001918) IncFII	IncF		tet(B) aph(6)-Id aph(3'')-Ib				iutA iucA iss iroE iroN mchF cvaC
						pN17S0914-2	98995	Y		IncI1-I(Gamma)	IncI		blaCMY-2
						pN17S0914-3	46121	Y		IncX1	IncX
N17S922	N/A	Litchfield	Retail turkey	GA	2017	chromosome	4675372	Y	3 13 1 9 24 12 2 11 5 14 16 6 4						mdsA mdsB	golS golT fieF		CP082600-CP082601
						pN17S0922	100987	Y		IncI1-I(Gamma)	IncI		blaTEM-1
N17S1196	N/A	Newport	Retail beef	CO	2017	chromosome	4894527	Y	3 13 1 9 24 12 2 11 5 14 16 6 4						mdsA mdsB	golS golT fieF		CP082598-CP082599
						pN17S1196	123445	Y		IncC	IncC		blaCMY-2 blaCMY-2 sul2 aph(3'')-Ib aph(6)-Id tet(A) floR
N17S1270	N/A	Hadar	Retail turkey	CO	2017	chromosome	4763066	Y	3 13 1 9 24 12 2 11 5 14 16 6 4				aph(3'')-Ib aph(6)-Id tet(A)		mdsA mdsB	golS golT fieF		CP082639-CP082640
						pN17S1270_circular	13949	Y		Col440I	Col		tet(A) blaTEM-1
N17S1304	N/A	Schwarzengrund	Retail turkey	GA	2017	chromosome	4748310	Y	4 6 16 14 5 11 2 18 24 9 1 13 3						mdsB mdsA	fieF golT golS pcoE pcoS pcoR pcoD pcoC pcoB pcoA silP silA silB silF silC silR silS silE		CP082636-CP082638
						pN17S1304-1	117763	Y		IncFII	IncF		sul1 aac(3)-VIa aadA1	qacEdelta1		merR merT merP merC
						pN17S1304-2	9473	Y		IncQ1	IncQ		tet(A) aph(3'')-Ib sul2
N17S1352	N/A	Heidelberg	Retail turkey	MD	2017	chromosome	4854520	Y	3 13 1 9 24 12 2 11 5 14 16 6 4				fosA7		mdsA mdsB	arsR golS golT fieF		CP082629-CP082635
						pN17S1352-1	315781	Y		IncHI2 IncHI2A	IncH		aadA1 mcr-9.1			terW terZ terD merC merP merT merR pcoS arsC
						pN17S1352-2	42592	Y		IncN	IncN		blaCTX-M-1
						pN17S1352-3	4753	Y			Unknown
						pN17S1352-4	4593	Y		ColRNAI	Col
						pN17S1352-5	3223	Y			Unknown
						pN17S1352-6	1474	Y			Unknown
N17S1441	N/A	Derby	Retail pork	PA	2017	chromosome	4872905	Y	3 13* 1 12 9 24 23 11 2 12 5 16 6 4				fosA7.3 tet(A) sul1 aadA2	qacEdelta1	mdsA mdsB	golS golT fieF merR merT merP merC		CP082627-CP082628
						pN17S1441	85883	Y		IncI1-I(Gamma)	IncI
N17S1465	N/A	I 4,[5],12:i:-	Retail pork	SC	2017	chromosome	4998918	Y	3 13 1 9 24 12 2 11 5 14 16 6 4	IncQ1			tet(B) aph(6)-Id aph(3'')-Ib sul2 blaTEM-1		mdsA mdsB	merR merT merP merC golS golT pcoS pcoR pcoD pcoC pcoA silP silA silB silF silC silR silS silE arsC arsB arsA arsD arsR fieF		CP082624-CP082626
						pN17S1466-1	249408	Y		IncHI2 IncHI2A	IncH		mph(E) msr(E) armA sul1 aph(3')-Ia aadA2 mcr-9.1	qacEdelta1		arsC terW terZ terD merE merD merA merT merR pcoS
						pN17S1466-2	92018	Y		IncY	IncY
N17S1545	N/A	Kentucky	Retail chicken	MD	2017	chromosome	4783876	Y	4 6 16 5 11 2 12 24 9 1 8 3						mdsB mdsA	fieF golT golS		CP082619-CP082623
						pN17S1545-1	272693	Y		IncHI2 IncHI2A	IncH		aph(3'')-Ib aph(6)-Id			fieF golT golS	iucA iutA
						pN17S1545-2	120123	Y		IncFII(29)	IncF		aadA1 aac(3)-VIa sul1 tet(A)	qacEdelta1		merC merP merT merR
						pN17S1545-3	77371	N			Unknown
						pN17S1545-4	47433	Y		IncX1	IncX
N17S1592	N/A	Infantis	Retail chicken	TN	2017	chromosome	4726954	Y	3 13 1 9 24 14 5 11 2 12 16 6 4						mdsA mdsB	arsR golS golT fieF		CP082617-CP082618
						pN17S1592	272693	Y		IncFIB(pN55391)	IncF		aph(3')-Ia aadA1 sul1 tet(A) dfrA14	qacEdelta1		merC merP merT merR	ybtP ybtQ
N18S0017	N/A	Agona	Retail pork	IA	2018	chromosome	5057478	Y	3 8 1 9 24 23 11 2 12 19 5 16 6 4				fosA7.2 tet(B) sul2		mdsA mdsB	silE silS silR silC silF silB silA silP pcoA pcoB pcoC pcoD pcoR pcoS pcoE golS golT fieF	sinH papG-II papF papE papC ireA	CP082615-CP082616
						pN18S0017	180114	Y		IncC	IncC		blaCMY-2 aadA1 aac(3)-VIa sul1 sul2 mph(G) mef(C) mph(E) msr(E) tet(D)			merR merT merP merA merB merD merE
N18S0035	N/A	Reading	Retail turkey	MO	2018	chromosome	4644749	Y	4 6 16 14 5 11 2 18 24 9 1 13 3						mdsB mdsA	fieF golT golS	sinH	CP082611-CP082614
						pN18S0035-1	10911	Y		IncQ1	IncQ		tet(A) aph(6)-Id aph(3'')-Ib sul2
						pN18S0035-2	10384	Y		Col440II, Col(pHAD28)	Col		blaTEM-1
						pN18S0035-3	5202	N		ColpVC	Col
N18S0133	N/A	Kentucky	Retail chicken	GA	2018	chromosome	4786626	Y	4 6 16 5 11 2 12 24 9 1 8 3						mdsB mdsA	fieF golT golS	sinH	CP082697-CP082700
						pN18S0133-1	271805	Y		IncHI2	IncH		aph(6)-Id aph(3'')-Ib			pcoE pcoS pcoR pcoD pcoC pcoB pcoA silP silA silB silF silC silR silS silE terW terZ terD	iutA iucA
						pN18S0133-2	118164	Y		IncFII(29)	IncF		aadA1 aac(3)-VIa sul1 tet(A)	qacEdelta1		merC merP merT merR
						pN18S0133-3	47433	Y		IncX1	IncX
N18S0173	N/A	I 4,[5],12:i:-	Retail pork	GA	2018	chromosome	5073615	Y	3 13 1 9 24 12 2 11 5 14 16 6 4	IncQ1			tet(B) sul2 aph(3'')-Ib aph(6)-Id blaTEM-1		mdsA mdsB	merR merT merP merC golS golT pcoS pcoR pcoD pcoC pcoA silP silA silB silF silC silR silS silE arsC arsB arsA arsD arsR fieF	sinH	CP082696
N18S0175	N/A	Saintpaul	Retail chicken	KS	2018	chromosome	4877384	Y	3 13 1 9 24 12 2 11 5 14 16 6 4				blaTEM-1 sul1 aadA2 ant(2'')-Ia	qacE	mdsA	golS golT fieF	sinH	CP083385-CP083386
						pN18S0175	3257	Y		Col440I, Col(pHAD28)	Col
N18S0236	N/A	Kentucky	Retail chicken	CA	2018	chromosome	4831155	Y	3 8 1 9 24 12 2 11 5 16 6 4						mdsA mdsB	golS golT fieF	sinH	CP082692-CP082695
						pN18S0236-1	249532	N		IncHI2 IncHI2A	IncH		aph(3'')-Ib aph(6)-Id			pcoE pcoS pcoR pcoD pcoC pcoB pcoA silP silA silB silF silC silR silS silE terD terZ terW	iucA iutA
						pN18S0236-2	98993	Y		IncI1-I(Gamma)	IncI		blaCMY-2
						pN18S0236-3	47457	Y		IncX1	IncX
N18S0357	N/A	Derby	Retail pork	MO	2018	chromosome-p1	4048410	N	16 5 12 2 11 23 24 9 12 1 13* 3				aadA2 sul1 tet(A)	qacEdelta1	mdsB mdsA	fieF golT golS merC merP merT merR	sinH	AAFFBD000000000
						chromosome-p2	841921	N	6 4				fosA7.3
						pN18S0357-2	3830	Y		Col440I, Col(pHAD28)	Col
N18S0406	N/A	Bredeney	Retail turkey	MO	2018	chromosome	4492868	Y	3 13 1 9 24 18 2 11 5 14 16 6 4				blaCMY-2			fieF	sinH	CP082685-CP082691
						pN18S0406-1	145065	Y		IncHI2 IncHI2A	IncH		sul1 aadA2 ant(2'')-Ia	qacEdelta1		terW terZ terD
						pN18S0406-2	11509	N		Col(pHAD28)	Col
						pN18S0406-5	4018	Y		Col(pHAD28)	Col
						pN18S0406-3	51341	N			Unknown
						pN18S0406-6	2511	Y		Col440I, Col(pHAD28)	Col
						pN18S0406-2	237719	N			Unknown
N18S0476	N/A	Agona	Retail turkey	IA	2018	chromosome	4879125	Y	3 8 1 9 24 23 11 2 12 19 5 16 6 4				fosA7.2		mdsA mdsB	golS golT fieF	sinH	CP082683-CP082684
						pN18S0476	4089	Y			Unknown
N18S0597	N/A	Typhimurium	Retail chicken	NC	2018	chromosome	4996846	Y	4 6 16 14 5 11 2 12 24 9 1 13 3				tet(A) sul2 tet(C) aadA1 aac(3)-VIa sul1	qacEdelta1	mdsB mdsA	fieF merR golT golS terW terZ terD merE merD merA merT merR silE silS silR silC silF silB silA silP	sinH	CP082681-CP082682
						pN18S0597	4674	Y		Col(pHAD28)	Col
N18S0645	N/A	Typhimurium	Retail chicken	PA	2018	chromosome	4813315	Y	13 1 9 24 12 2 11 5 14 16 6 4 3				blaCMY-2		mdsA mdsB	fieF golS golT	sinH	CP082674-CP082680
						pN18S0645-1	147099	N		IncC	IncC		tet(A) sul2			merR	ybtP ybtQ
						pN18S0645-2	42855	Y		IncX1	IncX
						pN18S0645-4	3257	Y		Col440I Col(pHAD28)	Col
						pN18S0645-5	3003	Y		Col(pHAD28)	Col
						pN18S0645-6	2096	Y		ColpVC	Col
N18S0666	N/A	Typhimurium	Retail turkey	SC	2018	chromosome	4986144	Y	3 13 1 9 24 12 2 11 5 14 16 6 4				tet(C) aadA1 aac(3)-VIa sul1 sul2 tet(A)	qacEdelta1	mdsA mdsB	silE silS silR silC silF silB silA silP terW terZ terD merE merD merA merT merR golS golT merR fieF	sinH	CP082596-CP082597
						pN18S0666	4674	Y		Col(pHAD28)	Col
N18S0722	N/A	Agona	Retail turkey	NC	2018	chromosome	4879109	Y	4 6 16 5 19 12 2 11 23 24 9 1 8 3				fosA7.2		mdsB mdsA	fieF golT golS	sinH	CP082595
N18S0736	N/A	I 4,[5],12:r:-	Retail turkey	NY	2018	chromosome	4767849	Y	4 6 16 14 5 11 2 12 24 9 1 13 3				fosA7 sul1 aac(3)-VIa aadA1 tetB	qacEdelta1	mdsB mdsA	arsR golS golT fieF	sinH	CP082588-CP082594
						pN18S0736-1	69205	N		IncI1-I(Gamma)	IncI
						pN18S0736-1_2	19711	N			Unknown
						pN18S0736-3	4773	Y			Unknown
						pN18S0736-4	4110	Y			Unknown
						pN18S0736-5	3223	Y			Unknown
						pN18S0736-6	2421	Y		Col440I	Col
N18S0789	N/A	Derby	Retail beef	WA	2018	chromosome-p1	4083057	N	16 5 12 2 11 23 24 9 12 1 13* 3 1				dfrA12 aadA2 sul1 tet(A)	qacEdelta1	mdsB mdsA	fieF golT golS merC merP merT merR	sinH	AAJANQ000000000
						chromosome-p2	824445	N	4 6				fosA7.3
						pN18S0789-1	112458	Y		IncI1-I(Gamma)	IncI					pcoE pcoS pcoR pcoD silP silA silB silF silC silR silS silE
						pN18S0789-2	9578	Y		ColE10	Col
						pN18S0789-3	4096	Y			Unknown
						pN18S0789-4	3830	Y		Col(pHAD28) Col440I	Col
						pN18S0789-5	3350	Y		Col(pHAD28) Col440I	Col
						pN18S0789-6	3223	Y			Unknown
						pN18S0789-7	2941	Y		Col(pHAD28)	Col
N18S0824	N/A	Kiambu	Retail turkey	GA	2018	chromosome	4606784	Y	3 13* 1 9 24 17 23 18 2 11 5 16 6 4						mdsA mdsB	golS golT fieF	sinH	CP082585-CP082587
						pN18S0824-1	62769	N		IncI1-I(Gamma)	IncI		sul1 aac(3)-VIa aadA1	qacEdelta1
						pN18S0824-2	4585	Y		Col156	Col
N18S0870	N/A	Saintpaul	Retail turkey	TX	2018	chromosome	4732032	Y	3 13 1 9 24 12 2 11 5 14 16 6 4						mdsA mdsB	golS golT fieF	sinH	CP083380-CP083384
						pN18S0870-1	75928	N		IncI1-I(Gamma)	IncI		tet(A) aadA1
						pN18S0870-2	33825	Y			Unknown
						pN18S0870-4	24777	N			Unknown		aac(3)-IId blaTEM aadA1 tet(A)
						pN18S0870-5	5464	Y		Col156	Col
N18S0935	N/A	Kentucky	Retail turkey	LA	2018	chromosome	4811211	Y	3 13* 1 9 24 2 11 5 16 6 4						mdsA mdsB	golS golT fieF	sinH	CP082579-CP082584
						pN18S0935-1	90290	N		IncI1-I(Gamma)	IncI		tet(B)
						pN18S0935-2	14459	N		Col(pHAD28) Col440II	Col		blaTEM-1 blaTEM-1
						pN18S0935-3	5631	Y		ColRNAI	Col
						pN18S0935-4	3754	Y		Col156	Col
						pN18S0935-5	3373	Y			Unknown
N18S0981	N/A	Typhimurium	Retail chicken	PA	2018	chromosome	4994513	Y	4 6 16 14 5 11 2 12 24 9 1 13* 3				tet(A) sul2 tet(C) aadA1 aac(3)-VIa sul1	qacEdelta1	mdsB mdsA	fieF merR golT golS terW terZ terD merE merD merA merT merR silE silS silR silC silF silB silA silP	sinH	CP082576-CP082578
						pN18S0981-1	31254	Y		IncX4	IncX
						pN18S0981-2	4674	Y		Col(pHAD28)	Col
N18S0991	N/A	Senftenberg	Retail turkey	IA	2018	chromosome	4961366	Y	4 6 16 5 12 2 11 24 9 1 8 3						mdsB mdsA	fieF golT golS pcoE pcoS pcoR pcoD pcoC pcoB pcoA silP silA silB silF silC silR silS silE	sinH	CP082574-CP082575
						pN18S0991	87577	Y		IncC	IncC		floR tet(A) aph(6)-Id aph(3'')-Ib sul2 sul3 aadA1 cmlA1 aadA2 ant(2'')-Ia cmlA blaTEM-1 aph(3')-Ia	qacL qacEdelta1
N18S0993	N/A	I 4,[5],12:i:-	Retail turkey	IA	2018	chromosome	4817368	Y	3 13 1 9 24 12 2 11 5 14 16 6 4						mdsA mdsB	golS golT fieF	sinH	CP082571-CP082573
						pN18S0993-1	235635	Y		IncHI1A IncHI1B IncFIA(HI1) IncQ1	Combination		tet(B) sul1 aadA2 dfrA12 blaTEM-1 aac(3)-IId aph(6)-Id aph(3'')-Ib sul2	qacEdelta1		silE silS silR silC silF silB silA silP pcoA pcoB pcoC pcoD pcoR pcoS pcoE
						pN18S0993-2	93838	Y		IncFIB(S) IncFII(S)	IncF	spvRABCD
N18S1260	N/A	Kentucky	Retail chicken	MO	2018	chromosome	4767849	Y	3 8 1 9 24 12 2 11 5 16 6 4						mdsA mdsB	fieF golT golS	sinH	CP082567-CP082570
						pN18S1260-1	146010	Y		IncFII IncFIB(AP001918)	IncF		aph(6)-Id aph(3'')-Ib tet(B)				iutA iucA iss iroE iroN mchF cvaC
						pN18S1260-2	90348	N			Unknown
						pN18S1260-3	52597	N		IncX1	IncX
N18S1350	N/A	Albany	Retail beef	TN	2018	chromosome	4810629	Y	4 6 16 5 11 2 12 24 9 1 8 3						mdsB mdsA	fieF golT golS	sinH	CP082666-CP082667
						pN18S1350	353746	Y		IncHI2 IncHI2A	IncH		tet(B) aac(6')-Ib4 aadA1 mcr-9.1			terW terZ terD merC merP merT merR pcoS arsC
N18S1429	N/A	Reading	Retail turkey	MN	2018	chromosome	4646351	Y	3 13 1 9 24 18 2 11 5 14 16 6 4						mdsB mdsA	fieF golT golS	sinH	CP082566
N18S1563	N/A	Kentucky	Retail chicken	TN	2018	chromosome	4789359	Y	4 6 16 5 11 2 12 24 9 1 8 3						mdsB mdsA	fieF golT golS	sinH	CP082562-CP082565
						pN18S1563-1	148162	Y		IncFII IncFIB(AP001918)	IncF		aph(6)-Id aph(3'')-Ib tet(B)				iutA iucA iss iroE iroN mchF cvaC
						pN18S1563-2	98998	Y		IncI1-I(Gamma)	IncI		blaCMY-2
						pN18S1563-3	45970	Y		IncX1	IncX
N18S1595	N/A	Typhimurium	Retail chicken	TN	2018	chromosome	5000104	Y	3 13 1 9 24 12 2 11 5 14 16 6 4				sul1 aac(3)-VIa aadA1 tet(C) sul2 tet(A)	qacEdelta1	mdsA mdsB	silP silA silB silF silC silR silS silE merR merT merA merD merE terD terZ terW golS golT merR fieF	sinH	CP082558-CP082561
						pN18S1595-1	102421	Y		IncI1-I(Gamma)	IncI		blaCMY-2
						pN18S1595-2	4674	Y		Col(pHAD28)	Col
N18S1602	N/A	Schwarzengrund	Retail turkey	TN	2018	chromosome	4703734	Y	3 13 1 9 24 18 2 11 5 14 16 6 4						mdsA mdsB	silE silS silR silC silF silB silA silP pcoA pcoB pcoC pcoD pcoR pcoS pcoE golS golT fieF	sinH	CP082554-CP082557
						pN18S1602-1	62543	N		IncI1-I(Gamma)	IncI		blaHER-3
						pN18S1602-2	9473	Y		IncQ1	IncQ		tet(A) aph(3'')-Ib sul2
						pN18S1602-3	4936	Y			Unknown
N18S1634	N/A	Typhimurium	Retail chicken	SC	2018	chromosome	4811073	Y	4 6 16 14 5 11 2 12 24 9 1 13 3						mdsB mdsA	fieF golT golS	sinH	CP082548-CP082553
						pN18S1634-1	103210	Y		IncI1-I(Gamma)	IncI		blaCMY-2
						pN18S1634-2	89759	Y		IncC	IncC		sul2 tet(A)			merR
						pN18S1634-3	34541	Y		IncX1	IncX
						pN18S1634-4	4681	Y		Col(pHAD28)	Col
						pN18S1634-5	1749	Y			Unknown
N18S1655	N/A	Newport	Retail beef	NM	2018	chromosome	4871077	Y	3 13 1 9 24 12 2 11 5 14 16 6 4						mdsA mdsB	golS golT fieF	sinH	CP082546-CP082547
						pN18S1655	146581	Y		IncC	IncC		floR tet(A) aph(6)-Id aph(3'')-Ib sul2 blaCMY-2			merE merD merB merA merP merT merR
N18S1677	N/A	Typhimurium	Retail chicken	PA	2018	chromosome	4954884	Y	3 13 1 9 24 12 2 11 5 14 16 6 4				blaCMY-2		mdsA mdsB	golS golT fieF	sinH	CP082543-CP082545
						pN18S1677-1	156149	Y		IncC	IncC		sul2 tet(A)			merR	ybtQ ybtP
						pN18S1677-2	5676	Y			Unknown
N18S1943	N/A	Hadar	Retail turkey	NM	2018	chromosome	4764991	Y	3 13 1 9 24 12 2 11 5 14 16 6 4				tet(A) aph(6)-Id aph(3'')-Ib		mdsA mdsB	golS golT fieF	sinH	CP082540-CP082542
						pN18S1943-1	125299	N		IncI1-I(Gamma)	IncI		tet(A) aadA1 blaTEM-1 aac(3)-IId
						pN18S1943-2	4633	Y		ColRNAI	Col
N18S1988	N/A	Infantis	Retail chicken	TX	2018	chromosome	4730425	Y	3 13 1 9 24 14 5 11 2 12 16 6 4						mdsA mdsB	arsR golS golT fieF	sinH	CP082538-CP082539
						pN18S1988	317395	Y		IncFIB(pN55391)	IncF		tet(A) sul1 aadA1 dfrA14 aac(3)-IVa aph(4)-Ia floR blaCTX-M-65	qacEdelta1		merR merT merP merC	ybtQ ybtP
N18S2042	N/A	Infantis	Retail beef	CA	2018	chromosome	4833661	Y	3 13 1 9 24 14 5 11 2 12 16 6 4				tet(A) blaCTX-M-65		mdsA mdsB	arsR merR merT merP merC golS golT fieF	sinH	CP082536-CP082537
						pN18S2042	168399	Y		IncFIB(pN55391)	IncF						ybtP ybtQ
N18S2145	N/A	Kentucky	Retail chicken	NM	2018	chromosome	4789846	N	6 4 3 8 1 9 24 12 2 11 5 16						mdsA mdsB	fieF golS golT	sinH	CP082532-CP082535
						pN18S2145-1	147354	Y		IncFII	IncF		tet(B) aph(3'')-Ib aph(6)-Id				iroN iroE iss iucA iutA cvaC mchF
						pN18S2145-2	98993	Y		IncI1-I(Gamma)	IncI		blaCMY-2
						pN18S2145-3	46028	Y		IncX1	IncX
N18S2154	N/A	Hadar	Retail turkey	NM	2018	chromosome	4763070	Y	3 13 1 9 24 12 2 11 5 14 16 6 4				aph(3'')-Ib aph(6)-Id tet(A)		mdsA mdsB	golS golT fieF	sinH	CP082528-CP082531
						pN18S2154-2	5310	Y		ColRNAI	Col		aph(3')-Ia
						pN18S2154-3	41701	N			Unknown
						pN18S2154-1	13949	Y		Col(pHAD28) Col440I	Col		blaTEM-1 tet(A)
N18S2170	N/A	Typhimurium	Retail chicken	PA	2018	chromosome	4994305	Y	4 6 16 14 5 11 2 12 24 9 1 13 3				tet(A) sul2 tet(C) aadA1 aac(3)-VIa sul1	qacEdelta1	mdsB mdsA	fieF merR golT golS terW terZ terD merE merD merA merT merR silE silS silR silC silF silB silA silP	sinH	CP082526-CP082527
						pN18S2170	2096	Y			Unknown
N18S2188	N/A	Typhimurium	Retail chicken	GA	2018	chromosome	4861574	Y	3 13 1 9 24 12 11 2 5 14 16 6 4				blaCMY-2		mdsA mdsB	golS golT fieF	sinH	CP082523-CP082525
						pN18S2188-1	160500	Y		IncC	IncC		tet(A) sul2 aph(3')-Ia			merR	ybtP ybtQ
						pN18S2188-2	33657	Y		IncX1	IncX
N18S2198	N/A	Infantis	Retail chicken	NY	2018	chromosome	4738019	Y	3 13 1 9 24 14 5 11 2 12 16 6 4						mdsA mdsB	arsR golS golT fieF	sinH	CP082521-CP082522
						pN18S2198	310262	Y		IncFIB(pN55391)	IncF		blaCTX-M-65 floR aph(4)-Ia aac(3)-IVa aadA1 sul1 tet(A)	qacEdelta1		merC merP merT merR	ybtP ybtQ
